# Supplementary material
Source: MDPI journal article supplement (https://www.mdpi.com/2571-6131/4/2/18)
Supplement: s1 [file s1]

# Supporting Information: Prediction of Sodium Substituted Site of Octacalcium Phosphate: the Relationship of Ionic Pair Ratio in Reacting Solutions

Yuki Sugiura and Masanori Horie

## Experimental setting of the SH-malate containing system for OCP-SH-malate substitution

Thiomalate (SH-malate) was purchased from Tokyo Kasei Industrial Co., Japan. In the case of an acidic solution with increasing pH (OCP-SH-malate(Na)), 5.5 g of  $\text{CaCO}_3$  was immersed into 20 mL of 1 mol/L- $\text{H}_3\text{PO}_4$  and 500 mmol/L SH-malate with/without 2 mol/L NaCl solution. Following the elimination of initially formed  $\text{CO}_2$ , the samples were packed and incubated at 60°C for 1 day.

In the case of weak basic solution with decreasing pH (OCP-SH-malate-Na), we prepared two mother solutions; 2 mol/L  $\text{Na}_2\text{HPO}_4$  and 1 mol/L SH-malate which pH was adjusted at 8.0 by  $\text{NH}_3\text{aq}$ . Then, they were mixed 1: 1 in volume. 2.39 g of DCPD was immersed into 20 mL of cocktail solution containing 2 mol/L Na, 1 mol/L  $\text{PO}_4$  and 500 mmol/L at pH-8.36. The sample was packed and incubated at 60 °C for 1 day.

All samples were washed by distilled water for several times, then, dried in dry oven at 40 °C for overnight.

**Table S1.** Initial and final pH values of the SH-malate containing systems.

| Sample            | initial | Final |
|-------------------|---------|-------|
| OCP-SH-malate     | <1.00   | 5.02  |
| OCP-SH-malate(Na) | <1.00   | 5.18  |
| OCP-SH-malate-Na  | 8.36    | 6.86  |

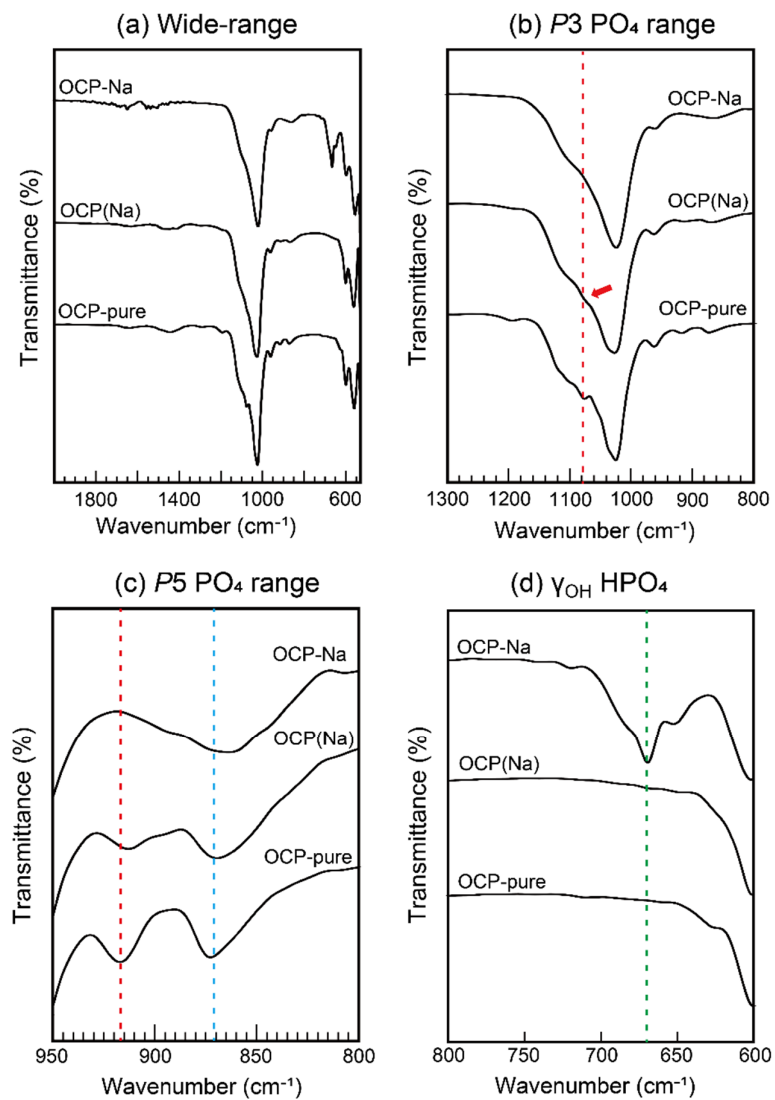

**Figure S1.** ATR-FT-IR spectra of the treated samples. (a) Wide range. (b)  $P3\text{ PO}_4$  vibration; the red broken line corresponds to the  $P3\text{ PO}_4$  vibration. (c)  $P5\text{ PO}_4$  vibration; the blue broken line corresponds to the  $P5\text{ PO}_4$  vibration. The green broken line corresponds to the  $\gamma_{\text{OH}}\text{ HPO}_4(P6\text{ PO}_4)$  vibration.

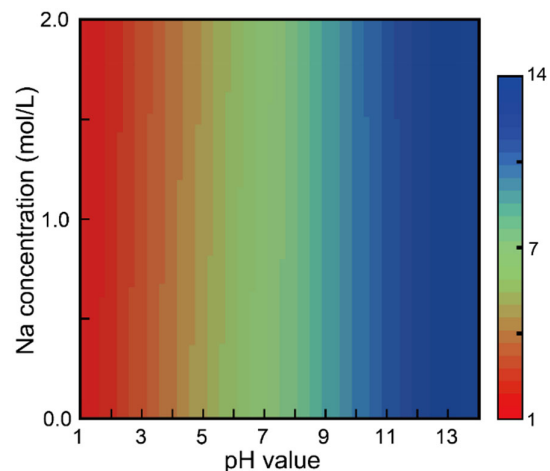

**Figure S2.** Calculated pH value of reacting solution as a function of Na concentration in the system of  $1.0\text{ mol/L PO}_4$  at  $60\text{ }^\circ\text{C}$  and  $1\text{ atm}$ .

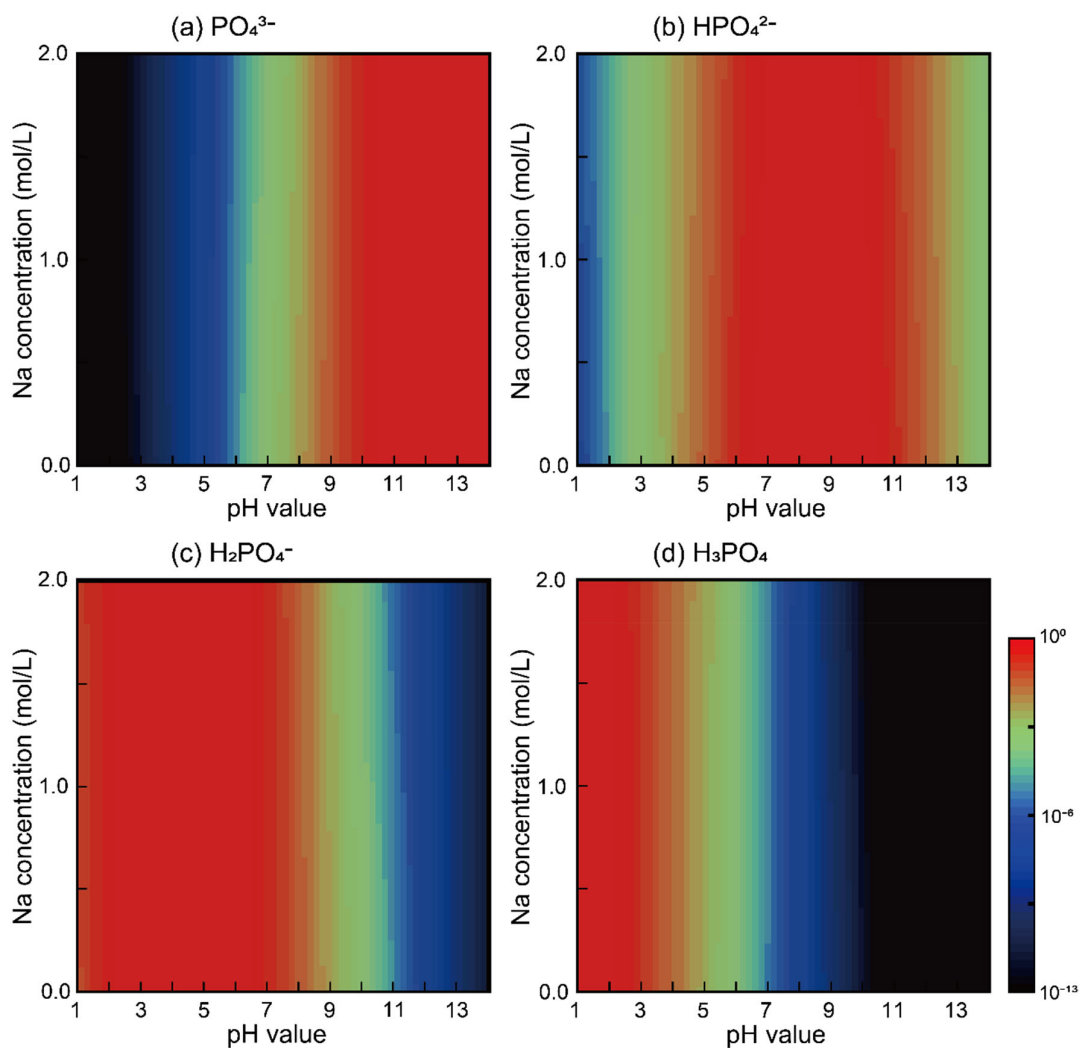

**Figure S3.** Calculated concentration of ionic pairs as a function of NaCl concentration in the systems of 1 mol/L  $\text{PO}_4$  and 2.0 mol/L Na containing solution at 60 °C. (a)  $\text{PO}_4^{3-}$ . (b)  $\text{HPO}_4^{2-}$ . (c)  $\text{H}_2\text{PO}_4^-$ . (d)  $\text{H}_3\text{PO}_4$ .

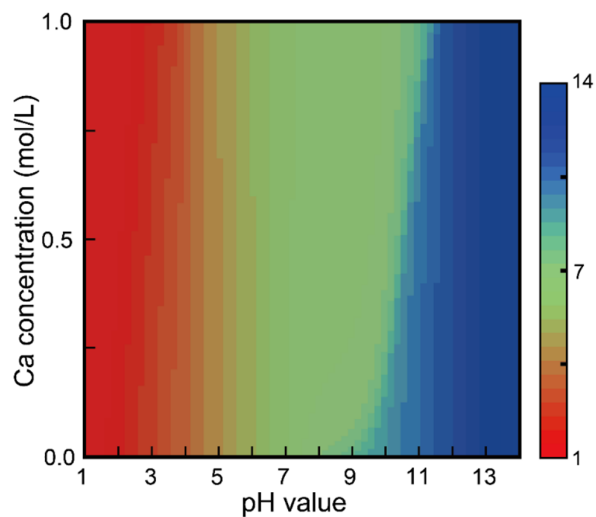

**Figure S4.** Calculated pH value of reacting solution as a function of Ca concentration in the system of 1.0 mol/L  $\text{PO}_4$  and 2.0 mol/L Na at 60 °C and 1 atm.

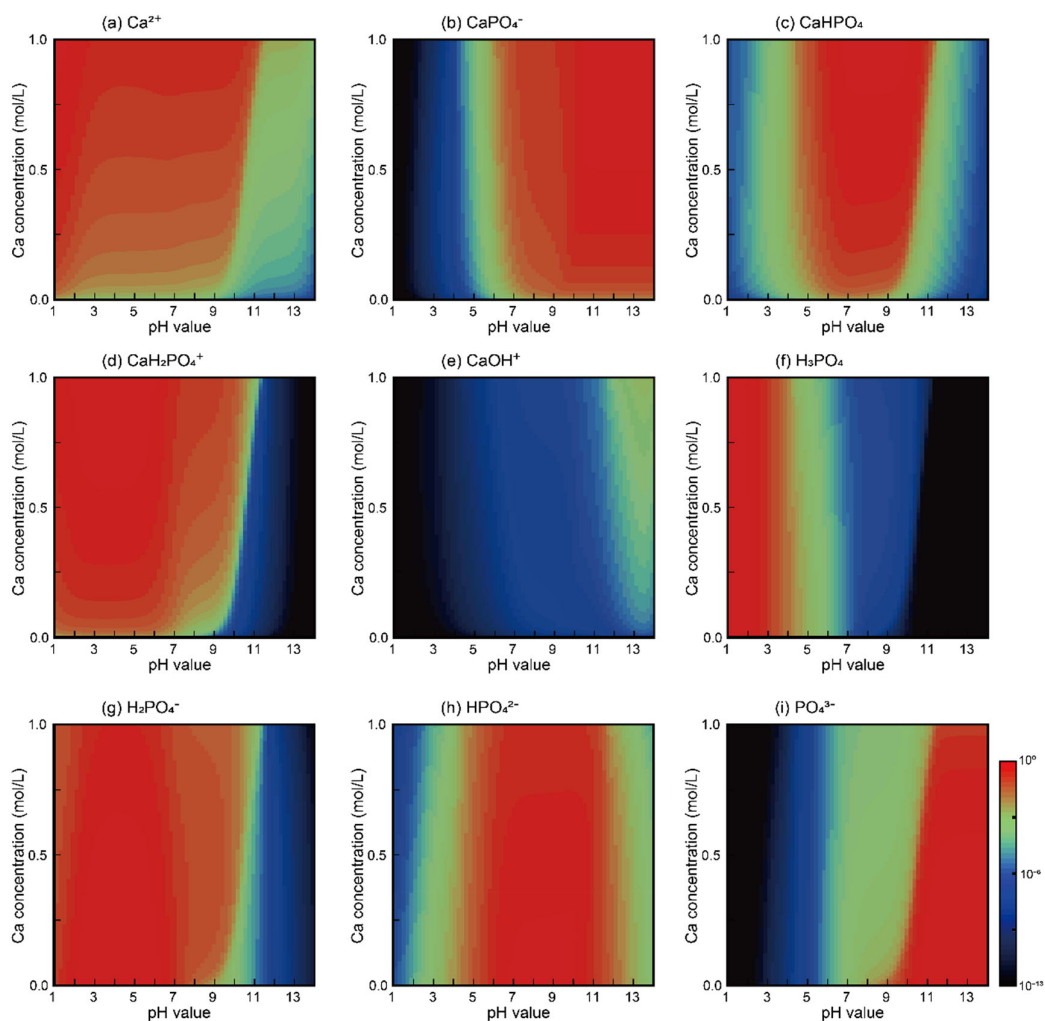

**Figure S5.** Calculated concentration of ionic pairs as a function of CaCl<sub>2</sub> concentration in the systems of 1 mol/L PO<sub>4</sub> and 2.0 mol/L Na containing solution at 60 °C. (a) Ca<sup>2+</sup>. (b) CaPO<sub>4</sub><sup>-</sup>. (c) CaHPO<sub>4</sub>. (d) CaH<sub>2</sub>PO<sub>4</sub><sup>+</sup>. (e) CaOH<sup>+</sup>. (f) PO<sub>4</sub><sup>3-</sup>. (g) HPO<sub>4</sub><sup>2-</sup>. (h) H<sub>2</sub>PO<sub>4</sub><sup>-</sup>. (i) H<sub>3</sub>PO<sub>4</sub>.
